# Supplementary material for: Slow relaxation of Dy(iii) single-ion magnets dominated by the simultaneous binding of chelating ligands in low-symmetry ligand-fields
Source: Royal Society of Chemistry journal article supplement (doi:10.1039/d1dt03637h), 2021-12-13
Supplement: d1dt03637h1.pdf [file d1dt03637h1.pdf]

## ESI

### Slow relaxations of Dy(III) single-ion magnets dominated by simultaneous binding of chelating ligands in low-symmetry ligand-fields

Hui-Ming Dong,<sup>a,b</sup> Zhong-Yi Liu,<sup>a</sup> Hui-Min Tang,<sup>a</sup> En-Cui Yang,<sup>\*a</sup> Yi-Quan Zhang<sup>\*c</sup> and Xiao-Jun Zhao<sup>a,b</sup>

<sup>a</sup> College of Chemistry, Tianjin Key Laboratory of Structure and Performance for Functional Molecules,  
Tianjin Normal University, Tianjin 300387, People's Republic of China

<sup>b</sup> Department of Chemistry, Collaborative Innovation Center of Chemical Science and Engineering, Nankai  
University, Tianjin 300071, People's Republic of China.

<sup>c</sup> Jiangsu Key Lab for NSLSCS, School of Physical Science and Technology, Nanjing Normal University,  
Nanjing 210023, China

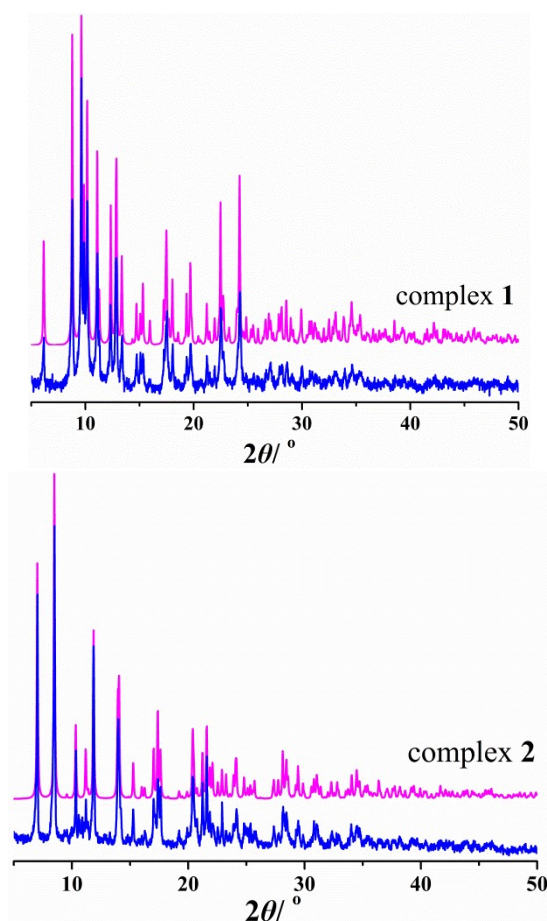

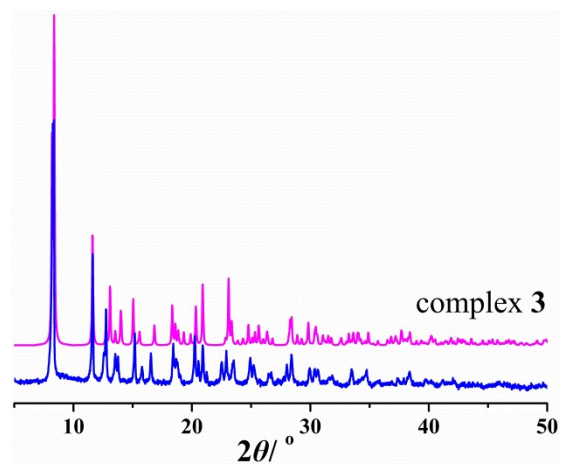

**Fig. S1.** Simulated (purple) and experimental (blue) PXRD patterns for **1 – 3**.

**Table S1.** Crystal and structure refinement data for **1–3**<sup>a</sup>

|                                                                                                        | <b>1</b>                                                        | <b>2</b>                                                          | <b>3</b>                                                        |
|--------------------------------------------------------------------------------------------------------|-----------------------------------------------------------------|-------------------------------------------------------------------|-----------------------------------------------------------------|
| empirical formula                                                                                      | C <sub>31</sub> H <sub>26</sub> DyN <sub>5</sub> O <sub>6</sub> | C <sub>46</sub> H <sub>39</sub> ClDyN <sub>7</sub> O <sub>7</sub> | C <sub>38</sub> H <sub>28</sub> DyN <sub>7</sub> O <sub>7</sub> |
| <i>F</i> <sub>w</sub>                                                                                  | 727.07                                                          | 999.79                                                            | 857.17                                                          |
| cryst size [mm]                                                                                        | 0.22 × 0.21 × 0.18                                              | 0.22 × 0.21 × 0.18                                                | 0.22 × 0.21 × 0.18                                              |
| cryst syst                                                                                             | triclinic                                                       | monoclinic                                                        | monoclinic                                                      |
| space group                                                                                            | <i>P</i> $\bar{1}$                                              | <i>P</i> 2 <sub>1</sub> / <i>c</i>                                | <i>C</i> 2/ <i>c</i>                                            |
| <i>a</i> [Å]                                                                                           | 10.249(2)                                                       | 13.5337(19)                                                       | 14.948(3)                                                       |
| <i>b</i> [Å]                                                                                           | 10.840(3)                                                       | 18.459(3)                                                         | 19.059(4)                                                       |
| <i>c</i> [Å]                                                                                           | 14.915(3)                                                       | 18.405(2)                                                         | 14.435(4)                                                       |
| $\alpha$ [°]                                                                                           | 90.353(5)                                                       | 90                                                                | 90                                                              |
| $\beta$ [°]                                                                                            | 105.031(5)                                                      | 111.693(9)                                                        | 119.103(3)                                                      |
| $\gamma$ [°]                                                                                           | 111.198(4)                                                      | 90                                                                | 90                                                              |
| <i>V</i> [Å <sup>3</sup> ]                                                                             | 1482.8(6)                                                       | 4272.3(11)                                                        | 3593.2(14)                                                      |
| <i>Z</i> , <i>D</i> <sub>c</sub> [g cm <sup>-3</sup> ]                                                 | 2, 1.628                                                        | 4, 1.554                                                          | 4, 1.584                                                        |
| <i>h</i> / <i>k</i> / <i>l</i>                                                                         | -12, 11/-13, 12/-12, 18                                         | -16, 16/-22, 23/-23, 22                                           | -18, 18/-10, 23/-18, 17                                         |
| <i>F</i> (000)                                                                                         | 722                                                             | 2012                                                              | 1708                                                            |
| $\mu$ [mm <sup>-1</sup> ]                                                                              | 2.572                                                           | 1.872                                                             | 2.139                                                           |
| reflections collected / unique                                                                         | 19742 / 6372                                                    | 24592 / 8817                                                      | 10301 / 3721                                                    |
| <i>R</i> <sub>int</sub>                                                                                | 0.0284                                                          | 0.0324                                                            | 0.0296                                                          |
| data / restraints / params                                                                             | 6132 / 0 / 391                                                  | 8814 / 12 / 560                                                   | 3721 / 66 / 259                                                 |
| <i>R</i> <sub>1</sub> <sup>a</sup> , <i>wR</i> <sub>2</sub> <sup>b</sup> [ <i>I</i> > 2σ ( <i>I</i> )] | 0.0373, 0.0706                                                  | 0.0238, 0.0607                                                    | 0.0331, 0.0979                                                  |
| <i>R</i> <sub>1</sub> , <i>wR</i> <sub>2</sub> [all data]                                              | 0.0489, 0.0746                                                  | 0.0323, 0.0637                                                    | 0.0392, 0.1008                                                  |
| GOF on <i>F</i> <sup>2</sup>                                                                           | 1.008                                                           | 1.039                                                             | 1.061                                                           |
| $\Delta\rho_{\max}$ , $\Delta\rho_{\min}$ [e·Å <sup>-3</sup> ]                                         | 1.609, -0.791                                                   | 0.76, -0.48                                                       | 1.040, -0.604                                                   |

<sup>a</sup> *R*<sub>1</sub> = Σ(|*F*<sub>o</sub>| - |*F*<sub>c</sub>|) / Σ|*F*<sub>o</sub>|; <sup>b</sup> *wR*<sub>2</sub> = [Σ*w*(|*F*<sub>o</sub>|<sup>2</sup> - |*F*<sub>c</sub>|<sup>2</sup>)<sup>2</sup> / Σ*w*(*F*<sub>o</sub>)<sup>2</sup>]<sup>1/2</sup>.

**Table S2.** Calculation of the agreement between the coordination polyhedron of the studied complexes with various ideal polyhedra using the SHAPE program\*

| SIM      | CShM             |                  |                   |
|----------|------------------|------------------|-------------------|
|          | SAP ( $D_{4d}$ ) | TDD ( $D_{2d}$ ) | BTPR ( $C_{2v}$ ) |
| <b>1</b> | 2.160            | 1.361            | 2.257             |
| <b>2</b> | 1.472            | 1.569            | 2.593             |
| <b>3</b> | 1.482            | 1.376            | 2.678             |

\* SAP = Square antiprism, TDD = Triangular dodecahedron and BTPR= Biaugmented trigonal prism

**Table S3.** Selected bond lengths (Å) and angles (deg) for **1**

|                 |            |                 |            |
|-----------------|------------|-----------------|------------|
| Dy(1)–O(3)      | 2.178(3)   | Dy(1)–O(1)      | 2.269(3)   |
| Dy(1)–O(5)      | 2.293(2)   | Dy(1)–N(1)      | 2.492(4)   |
| Dy(1)–N(3)      | 2.521(3)   | Dy(1)–N(4)      | 2.552(3)   |
| Dy(1)–N(2)      | 2.570(3)   | Dy(1)–N(5)      | 2.574(4)   |
| O(3)–Dy(1)–O(1) | 85.44(11)  | O(3)–Dy(1)–O(5) | 140.57(10) |
| O(1)–Dy(1)–O(5) | 122.35(11) | O(3)–Dy(1)–N(1) | 92.57(12)  |
| O(1)–Dy(1)–N(1) | 69.79(11)  | O(5)–Dy(1)–N(1) | 74.78(11)  |
| O(3)–Dy(1)–N(3) | 149.50(10) | O(1)–Dy(1)–N(3) | 71.65(10)  |
| O(5)–Dy(1)–N(3) | 69.93(10)  | N(1)–Dy(1)–N(3) | 97.86(12)  |
| O(3)–Dy(1)–N(4) | 78.62(11)  | O(1)–Dy(1)–N(4) | 76.84(11)  |
| O(5)–Dy(1)–N(4) | 131.05(11) | N(1)–Dy(1)–N(4) | 146.07(12) |
| N(3)–Dy(1)–N(4) | 76.78(11)  | O(3)–Dy(1)–N(2) | 69.49(10)  |
| O(1)–Dy(1)–N(2) | 137.98(11) | O(5)–Dy(1)–N(2) | 71.36(9)   |
| N(1)–Dy(1)–N(2) | 77.98(12)  | N(3)–Dy(1)–N(2) | 140.74(10) |
| N(4)–Dy(1)–N(2) | 126.96(12) | O(3)–Dy(1)–N(5) | 102.40(12) |
| O(1)–Dy(1)–N(5) | 135.70(11) | O(5)–Dy(1)–N(5) | 77.75(11)  |
| N(1)–Dy(1)–N(5) | 150.72(11) | N(3)–Dy(1)–N(5) | 81.90(11)  |
| N(4)–Dy(1)–N(5) | 62.64(11)  | N(2)–Dy(1)–N(5) | 83.86(11)  |

**Table S4.** Natural bond order (NBO) charges on each donor for the ground state of **1–3** obtained by CASSCF calculation

| Donors in <b>1</b> | charge | Donors in <b>2</b> | charge | Donors in <b>3</b> | charge |
|--------------------|--------|--------------------|--------|--------------------|--------|
| O5                 | -0.895 | O1                 | -0.921 | O1A                | -0.925 |
| N1                 | -0.212 | N1                 | -0.228 | N1A                | -0.229 |
| N2                 | -0.217 | N3                 | -0.375 | N2A                | -0.377 |
| N5                 | -0.362 | N5                 | -0.383 | N3                 | -0.379 |
| N3                 | -0.206 | N2                 | -0.236 | N1                 | -0.229 |
| O1                 | -0.890 | O2                 | -0.910 | O1                 | -0.925 |
| O3                 | -0.896 | N4                 | -0.381 | N3A                | -0.379 |
| N4                 | -0.345 | N6                 | -0.376 | N2                 | -0.377 |

**Table S5.** Selected bond lengths (Å) and angles (deg) for **2**

|                 |           |                 |            |
|-----------------|-----------|-----------------|------------|
| Dy(1)–O(1)      | 2.223(16) | Dy(1)–O(2)      | 2.2372(16) |
| Dy(1)–N(1)      | 2.491(2)  | Dy(1)–N(2)      | 2.499(2)   |
| Dy(1)–N(3)      | 2.543(2)  | Dy(1)–N(6)      | 2.546(2)   |
| Dy(1)–N(5)      | 2.558(2)  | Dy(1)–N(4)      | 2.563(2)   |
| O(1)–Dy(1)–O(2) | 134.86(7) | O(1)–Dy(1)–N(1) | 70.58(6)   |
| O(2)–Dy(1)–N(1) | 75.15(6)  | O(1)–Dy(1)–N(2) | 75.34(6)   |
| O(2)–Dy(1)–N(2) | 70.09(6)  | N(1)–Dy(1)–N(2) | 79.26(9)   |
| O(1)–Dy(1)–N(3) | 75.97(6)  | O(2)–Dy(1)–N(3) | 142.23(6)  |
| N(1)–Dy(1)–N(3) | 104.77(7) | N(2)–Dy(1)–N(3) | 147.67(6)  |
| O(1)–Dy(1)–N(6) | 142.27(6) | O(2)–Dy(1)–N(6) | 76.50(7)   |
| N(1)–Dy(1)–N(6) | 147.13(7) | N(2)–Dy(1)–N(6) | 106.18(7)  |
| N(3)–Dy(1)–N(6) | 87.85(7)  | O(1)–Dy(1)–N(5) | 79.45(7)   |
| O(2)–Dy(1)–N(5) | 120.87(6) | N(1)–Dy(1)–N(5) | 147.10(7)  |
| N(2)–Dy(1)–N(5) | 80.32(7)  | N(3)–Dy(1)–N(5) | 80.07(6)   |
| N(6)–Dy(1)–N(5) | 64.13(7)  | O(1)–Dy(1)–N(4) | 120.15(6)  |
| O(2)–Dy(1)–N(4) | 79.22(7)  | N(1)–Dy(1)–N(4) | 78.32(7)   |
| N(2)–Dy(1)–N(4) | 145.67(7) | N(3)–Dy(1)–N(4) | 64.23(7)   |
| N(6)–Dy(1)–N(4) | 80.36(7)  | N(5)–Dy(1)–N(4) | 130.28(8)  |

**Table S6.** Selected bond lengths (Å) and angles (deg) for **3**<sup>a</sup>

|                                |            |                                |            |
|--------------------------------|------------|--------------------------------|------------|
| Dy(1)–O(1)                     | 2.221(3)   | Dy(1)–N(3)                     | 2.546(4)   |
| Dy(1)–N(1)                     | 2.488(4)   | Dy(1)–N(2)                     | 2.547(4)   |
| O(1)–Dy(1)–N(1) <sup>#1</sup>  | 74.26(12)  | O(1)–Dy(1)–O(1) <sup>#1</sup>  | 132.66(16) |
| O(1)–Dy(1)–N(3)                | 80.10(12)  | O(1)–Dy(1)–N(1)                | 70.57(12)  |
| N(1) <sup>#1</sup> –Dy(1)–N(3) | 81.98(13)  | N(1) <sup>#1</sup> –Dy(1)–N(1) | 82.42(19)  |
| O(1)–Dy(1)–N(2) <sup>#1</sup>  | 79.15(12)  | O(1) <sup>#1</sup> –Dy(1)–N(3) | 123.89(12) |
| N(1)–Dy(1)–N(2)                | 146.09(12) | N(1)–Dy(1)–N(3)                | 149.57(13) |
| N(3)–Dy(1)–N(2) <sup>#1</sup>  | 72.96(13)  | N(3)–Dy(1)–N(3) <sup>#1</sup>  | 122.58(18) |
| N(3)–Dy(1)–N(2)                | 64.13(12)  | O(1)–Dy(1)–N(2)                | 142.92(12) |
| N(2) <sup>#1</sup> –Dy(1)–N(2) | 81.23(18)  | N(1)–Dy(1)–N(2) <sup>#1</sup>  | 108.19(13) |

<sup>a</sup> Symmetry codes: #1 – *x*, *y*, 1/2 – *z*.



**Table S7.** Hydrogen-bonding parameters (Å, deg) in **1–3**<sup>a</sup>

| D–H...A                          | <i>d</i> (D–H) | <i>d</i> (H...A) | <i>d</i> (D...A) | ∠DHA   |
|----------------------------------|----------------|------------------|------------------|--------|
| <b>1</b>                         |                |                  |                  |        |
| O(2)–H(2)...O(4) <sup>#1</sup>   | 0.820          | 2.381            | 2.893            | 121.33 |
| C(14)–H(14)...O(6) <sup>#2</sup> | 0.930          | 2.544            | 3.435            | 160.63 |
| <b>2</b>                         |                |                  |                  |        |
| C(21)–H(21)...O(4) <sup>#1</sup> | 0.930          | 2.417            | 3.221            | 144.74 |
| C(27)–H(27)...O(3) <sup>#2</sup> | 0.930          | 2.578            | 3.355            | 141.37 |
| <b>3</b>                         |                |                  |                  |        |
| C(14)–H(14)...O(2) <sup>#1</sup> | 0.930          | 2.349            | 3.172            | 147.42 |

\* Symmetry codes for **1**: <sup>#1</sup>1 – *x*, 1 – *y*, 1 – *z*; <sup>#2</sup> *x* + 1, *y*, *z*. For **2**: <sup>#1</sup>1 – *x*, 1 – *y*, 1 – *z*; <sup>#2</sup> – *x*, 1 – *y*, 1 – *z*; <sup>#3</sup> *x* – 1, *y*, *z*; <sup>#4</sup> *x*, 1/2 – *y*, *z* + 1/2. For **3**: <sup>#1</sup> *x*, 1 – *y*, *z* – 1/2.

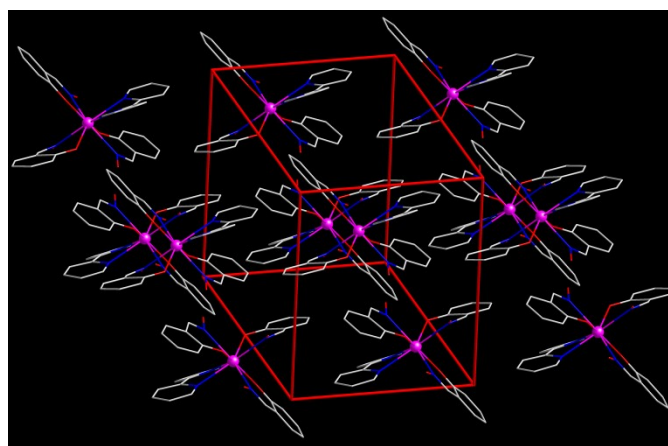

(a)

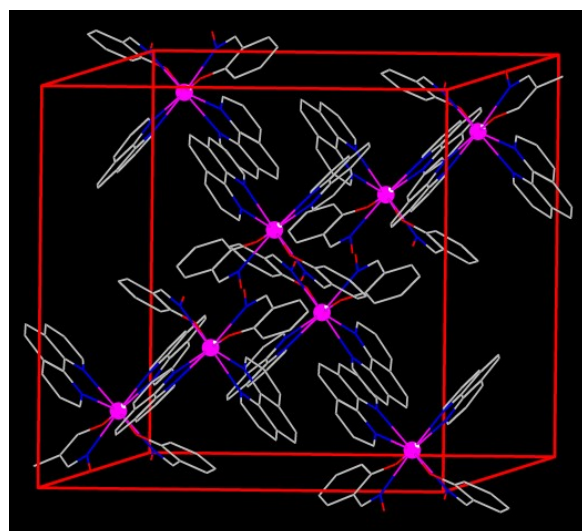

(b)

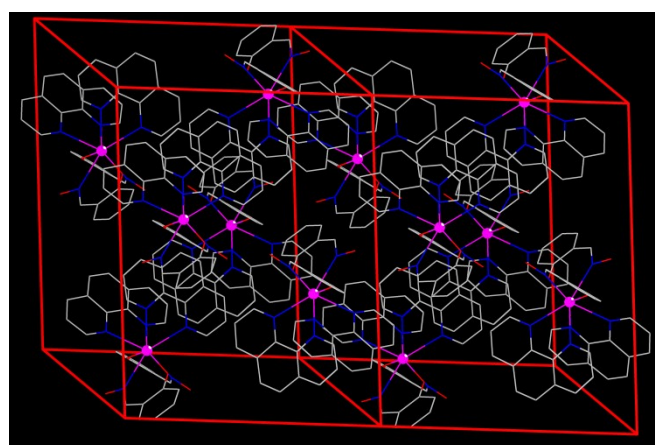

(c)

**Fig. S2.** Stacking structures of **1** (a) – **3** (c).

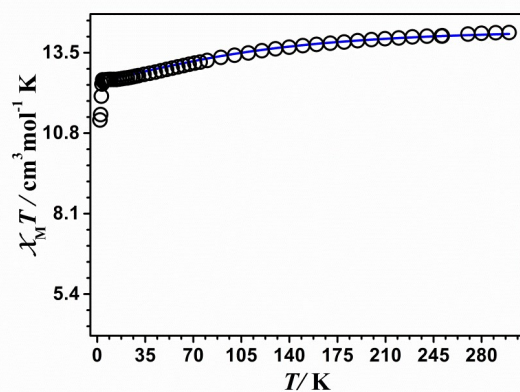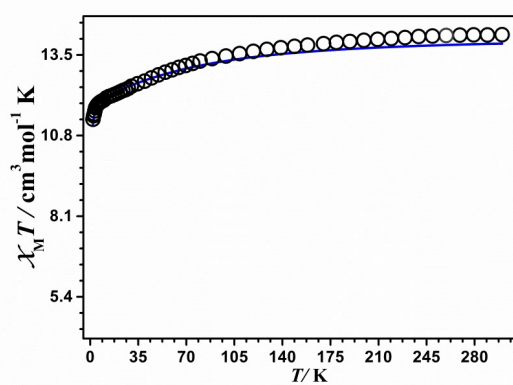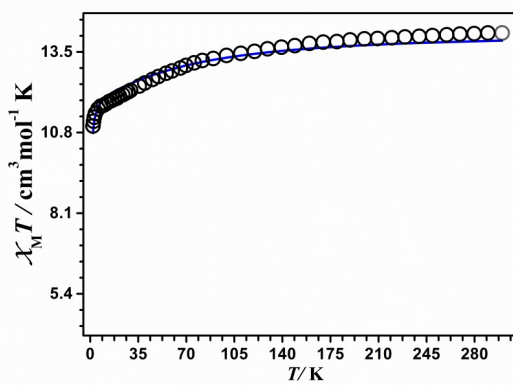

**Fig. S3.** Comparisons on the  $\chi_M T$ - $T$  curves between the theoretical calculation and experimental measurements for **1-3**.

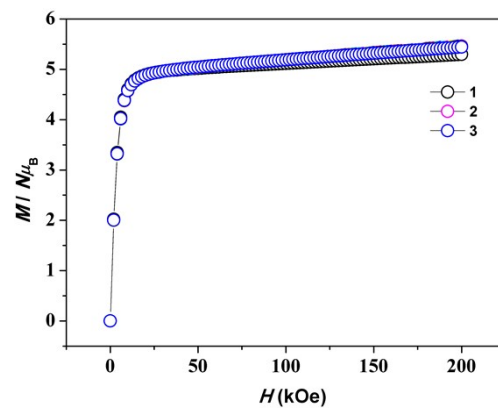

**Fig. S4.** The  $M$ - $H$  curves for the theoretical calculation by *ab initio* at 2.0 K for 1–3.

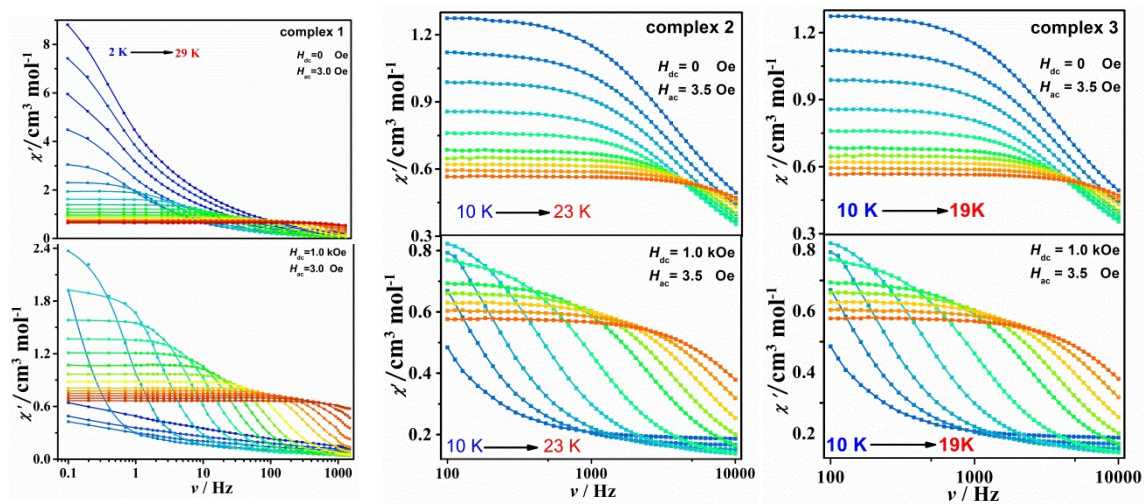

**Fig. S5.** Frequency dependence of the in-of-phase ac susceptibilities for 1–3.

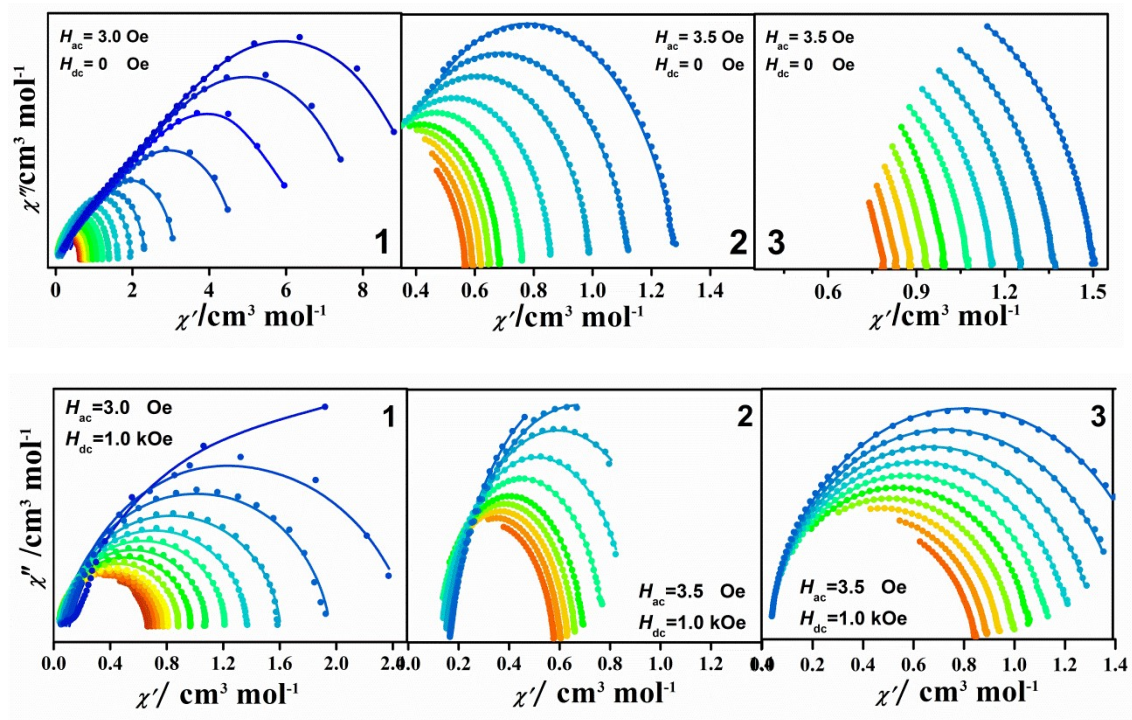

Fig. S6. Cole-Cole diagrams for 1–3 under zero and 1.0 kOe dc fields.

**Table S8.** The obtained fitting parameters for the Cole–Cole plots of **1** to the generalized Debye model under zero and 1.0 kOe dc fields.

| <i>T</i> / K | zero dc field                   |                                 |              |          | Optimal 1.0 kOe field           |                                 |              |          |
|--------------|---------------------------------|---------------------------------|--------------|----------|---------------------------------|---------------------------------|--------------|----------|
|              | $\chi_T$ (cm <sup>3</sup> /mol) | $\chi_S$ (cm <sup>3</sup> /mol) | $\tau$ / (s) | $\alpha$ | $\chi_T$ (cm <sup>3</sup> /mol) | $\chi_S$ (cm <sup>3</sup> /mol) | $\tau$ / (s) | $\alpha$ |
| 29.0         | 0.64158                         | 0.01260                         | 4.23569E-5   | 0.03918  | 0.66517                         | 0.04215                         | 4.32263E-5   | 0.09031  |
| 28.5         | 0.68209                         | 0.02491                         | 5.41507E-5   | 0.03867  |                                 |                                 |              |          |
| 28.0         | 0.69867                         | 0.03381                         | 7.10242E-5   | 0.03776  | 0.69623                         | 0.03601                         | 7.39467E-5   | 0.05907  |
| 27.5         | 0.70736                         | 0.04757                         | 9.25936E-5   | 0.03495  |                                 |                                 |              |          |
| 27.0         | 0.71822                         | 0.03118                         | 1.13849E-4   | 0.02916  | 0.72218                         | 0.01645                         | 1.16208E-4   | 0.05705  |
| 26.5         | 0.73094                         | 0.02933                         | 1.43776E-4   | 0.02814  |                                 |                                 |              |          |
| 26.0         | 0.75129                         | 0.03793                         | 1.82743E-4   | 0.02622  | 0.74913                         | 0.01806                         | 1.92162E-4   | 0.05352  |
| 25.0         | 0.77484                         | 0.04014                         | 2.83642E-4   | 0.02522  | 0.77903                         | 0.03109                         | 3.17093E-4   | 0.04794  |
| 24.0         | 0.81417                         | 0.03932                         | 4.18176E-4   | 0.03368  | 0.81174                         | 0.0313                          | 4.9049E-4    | 0.04631  |
| 22.0         | 0.88975                         | 0.04476                         | 8.17934E-4   | 0.03806  | 0.88541                         | 0.0337                          | 0.00103      | 0.04518  |
| 20.0         | 0.97829                         | 0.05010                         | 0.00138      | 0.04474  | 0.97218                         | 0.03971                         | 0.00188      | 0.04175  |
| 18.0         | 1.08860                         | 0.05594                         | 0.00222      | 0.05314  | 1.07885                         | 0.04362                         | 0.00322      | 0.04192  |
| 16.0         | 1.22975                         | 0.06578                         | 0.00364      | 0.07053  | 1.21724                         | 0.04727                         | 0.00576      | 0.04808  |
| 14.0         | 1.41407                         | 0.07846                         | 0.00623      | 0.09159  | 1.37559                         | 0.05165                         | 0.01088      | 0.05444  |
| 12.0         | 1.65839                         | 0.10232                         | 0.01142      | 0.11942  | 1.60348                         | 0.06013                         | 0.02271      | 0.06093  |

---

|      |         |         |         |         |         |         |         |         |
|------|---------|---------|---------|---------|---------|---------|---------|---------|
| 10.0 | 2.03723 | 0.12464 | 0.02382 | 0.17971 | 1.95183 | 0.07313 | 0.06056 | 0.0701  |
| 8.0  | 2.49722 | 0.15792 | 0.05536 | 0.26094 | 2.4887  | 0.09105 | 0.21801 | 0.09406 |
|      |         |         |         |         | 3.82248 | 0.11034 | 1.79881 | 0.18111 |

---



**Table S9.** Calculated energy,  $g$  tensors, wave-functions and angles between the shortest Dy–O vector and the magnetic axis for the three lowest KDs of 1–3

| KDs      | Energy ( $K$ ) | $g_x$ | $g_y$ | $g_z$  | $\theta$ (deg) | wave-function                                                                                                                                                                       |
|----------|----------------|-------|-------|--------|----------------|-------------------------------------------------------------------------------------------------------------------------------------------------------------------------------------|
| <b>1</b> |                |       |       |        |                |                                                                                                                                                                                     |
| 1        | 0.0            | 0.000 | 0.001 | 19.779 | 6.7            | $100\% \pm 15/2\rangle$                                                                                                                                                             |
| 2        | 344.6          | 0.087 | 0.140 | 16.563 | 22.4           | $79\% \pm 11/2\rangle + 4\% \pm 9/2\rangle + 12\% \pm 7/2\rangle + 1\% \pm 5/2\rangle$                                                                                              |
| 3        | 467.7          | 1.180 | 1.493 | 13.898 | 48.2           | $2\% \pm 15/2\rangle + 11\% \pm 13/2\rangle + 26\% \pm 11/2\rangle + 8\% \pm 9/2\rangle +$<br>$27\% \pm 7/2\rangle + 8\% \pm 5/2\rangle + 13\% \pm 3/2\rangle + 2\% \pm 1/2\rangle$ |
| <b>2</b> |                |       |       |        |                |                                                                                                                                                                                     |
| 1        | 0.0            | 0.005 | 0.008 | 19.669 | 23.0           | $96\% \pm 15/2\rangle + 4\% \pm 11/2\rangle$                                                                                                                                        |
| 2        | 251.7          | 0.044 | 0.075 | 16.379 | 23.4           | $87\% \pm 13/2\rangle + 1\% \pm 11/2\rangle + 12\% \pm 9/2\rangle$                                                                                                                  |
| 3        | 433.2          | 0.632 | 0.889 | 12.979 | 24.4           | $2\% \pm 15/2\rangle + 68\% \pm 11/2\rangle + 1\% \pm 9/2\rangle +$<br>$26\% \pm 7/2\rangle + 1\% \pm 5/2\rangle + 1\% \pm 1/2\rangle$                                              |
| <b>3</b> |                |       |       |        |                |                                                                                                                                                                                     |
| 1        | 0.0            | 0.016 | 0.020 | 19.641 | 24.7           | $96\% \pm 15/2\rangle + 4\% \pm 11/2\rangle$                                                                                                                                        |
| 2        | 239.5          | 0.145 | 0.219 | 16.337 | 24.8           | $86\% \pm 13/2\rangle + 14\% \pm 9/2\rangle$                                                                                                                                        |
| 3        | 421.2          | 0.796 | 1.282 | 12.900 | 25.3           | $3\% \pm 15/2\rangle + 68\% \pm 11/2\rangle + 1\% \pm 9/2\rangle + 27\% \pm 7/2\rangle + 1\% \pm 1/2\rangle$                                                                        |

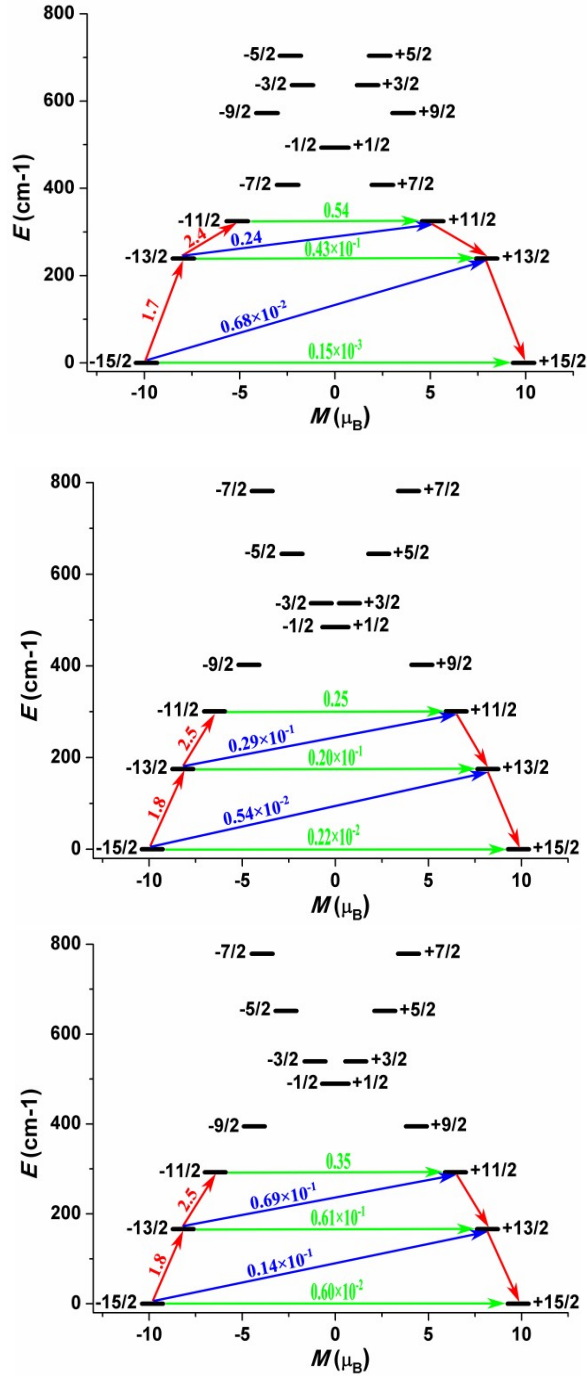

**Fig. S7.** *Ab initio* computed magnetization blocking barriers for 1–3. The horizontal black lines represent the KDs as a function of their magnetic moment along the magnetic axis. The horizontal green lines within KDs correspond to diagonal quantum tunnelling of magnetization (QTM); the non-horizontal lines show the spin-phonon transition paths. The numbers at each arrow stand for the mean absolute value of the corresponding matrix element of transition magnetic moment.

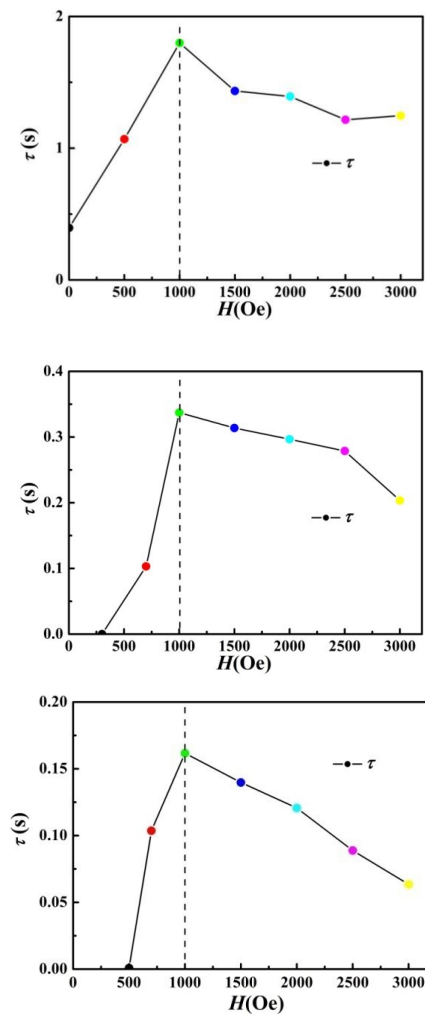

**Fig. S8.** Field dependence of the relaxation time for **1** (upper) – **3** (bottom) measured at 2.0 K.

**Table S10.** The obtained fitting parameters for the Cole–Cole plots of **2** to the generalized Debye model under zero and 1.0 kOe dc fields.

| <i>T</i> / K | zero dc field                        |                                      |                 |          | Optimal 1.0 kOe field                |                                      |                 |          |
|--------------|--------------------------------------|--------------------------------------|-----------------|----------|--------------------------------------|--------------------------------------|-----------------|----------|
|              | $\chi_T$ /<br>(cm <sup>3</sup> /mol) | $\chi_S$ /<br>(cm <sup>3</sup> /mol) | $\tau$ /<br>(s) | $\alpha$ | $\chi_T$ /<br>(cm <sup>3</sup> /mol) | $\chi_S$ /<br>(cm <sup>3</sup> /mol) | $\tau$ /<br>(s) | $\alpha$ |
| <b>2</b>     |                                      |                                      |                 |          |                                      |                                      |                 |          |
| 10.0         | 1.28822                              | 0.26813                              | 4.10222E-5      | 0.14579  | 1.26355                              | 0.16601                              | 0.00376         | 0.10786  |
| 11.0         | 1.13159                              | 0.23607                              | 3.9738E-5       | 0.14434  | 1.15873                              | 0.1536                               | 0.00162         | 0.10554  |
| 13.0         | 0.99926                              | 0.21558                              | 3.77246E-5      | 0.12994  | 1.03793                              | 0.14774                              | 8.09022E-4      | 0.10376  |
| 15.0         | 0.86544                              | 0.19304                              | 3.37116E-5      | 0.10918  | 0.88743                              | 0.13262                              | 3.50176E-4      | 0.08527  |
| 17.0         | 0.76469                              | 0.17643                              | 2.75605E-5      | 0.08917  | 0.78083                              | 0.12001                              | 1.51813E-4      | 0.07803  |
| 19.0         | 0.68509                              | 0.16018                              | 1.98142E-5      | 0.06256  | 0.69749                              | 0.10921                              | 6.42747E-5      | 0.07686  |
| 20.0         | 0.65064                              | 0.15348                              | 1.60911E-5      | 0.05533  | 0.66295                              | 0.10508                              | 4.21404E-5      | 0.07832  |
| 21.0         | 0.62079                              | 0.14558                              | 1.27395E-5      | 0.05537  | 0.6321                               | 0.10067                              | 2.78766E-5      | 0.08263  |
| 22.0         | 0.59292                              | 0.13979                              | 9.95303E-6      | 0.05785  | 0.60422                              | 0.09471                              | 1.85832E-5      | 0.09021  |
| 23.0         | 0.56778                              | 0.13586                              | 7.75894E-6      | 0.06043  | 0.57847                              | 0.08902                              | 1.25596E-5      | 0.09812  |
| <b>3</b>     |                                      |                                      |                 |          |                                      |                                      |                 |          |
| 10.0         | 1.50502                              | 0.24396                              | 8.42339E-6      | 0.14054  | 1.57064                              | 0.02089                              | 4.12165E-4      | 0.07202  |
| 11.0         | 1.36906                              | 0.22061                              | 8.14823E-6      | 0.1382   | 1.43483                              | 0.01568                              | 2.48976E-4      | 0.07666  |
| 12.0         | 1.25494                              | 0.19738                              | 7.75329E-6      | 0.1336   | 1.32007                              | 0.01268                              | 1.56067E-4      | 0.07937  |
| 13.0         | 1.15865                              | 0.18856                              | 7.38376E-6      | 0.12632  | 1.22653                              | 0.00842                              | 1.00519E-4      | 0.08692  |
| 14.0         | 1.07621                              | 0.15292                              | 6.55727E-6      | 0.12604  | 1.14094                              | 0.00581                              | 6.52123E-5      | 0.09273  |
| 15.0         | 0.79677                              | 0.08197                              | 5.00792E-6      | 0.13415  | 1.06709                              | 0.00542                              | 4.26776E-5      | 0.09832  |
| 16.0         | 0.74781                              | 0.03233                              | 3.92396E-6      | 0.14484  | 1.00189                              | 0.00669                              | 2.78241E-5      | 0.10444  |
| 17.0         | 0.70507                              | 0.01384                              | 2.97642E-6      | 0.15132  | 0.94374                              | 0.00755                              | 1.81752E-5      | 0.11208  |
| 18.0         | 0.66651                              | 0.00957                              | 2.0013E-6       | 0.17227  | 0.89201                              | 0.00771                              | 1.18237E-5      | 0.12137  |
| 19.0         | 0.63228                              | 0.00916                              | 1.56501E-6      | 0.17891  | 0.84554                              | 0.00828                              | 7.53577E-6      | 0.13521  |
